# Supplementary material
Source: PubMed Central journal article supplement (PMC1986592)

Normalized Unfolding Transitions for KIA7, +KIA7-, KIA7F and CG<sub>3</sub> KIA7

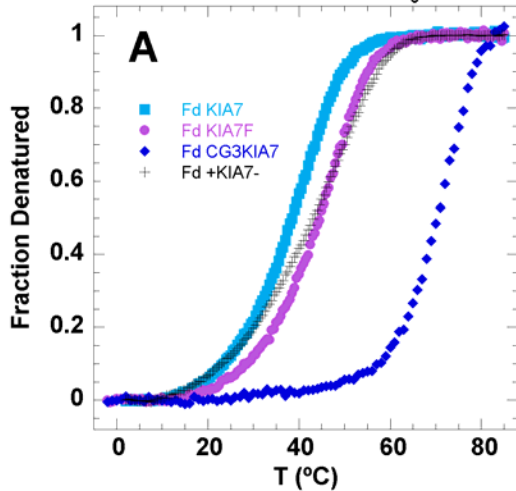

Van't Hoff Plots for KIA7, +KIA7-, KIA7F and CG<sub>3</sub> KIA7

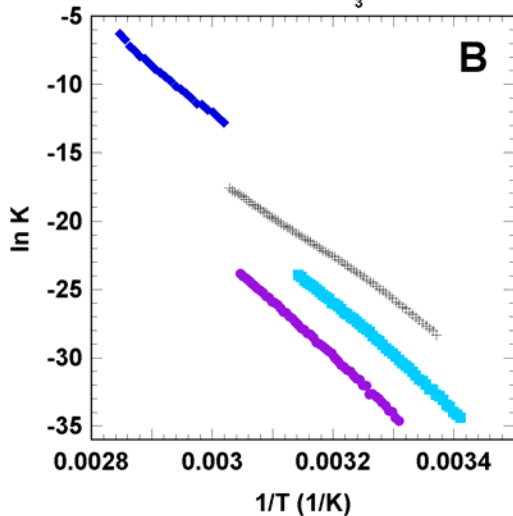

Supplement: pnas_0706876104_2.pdf [file pnas_0706876104_2.pdf]
