# Supplementary material
Source: PubMed Central journal article supplement (PMC1986592)

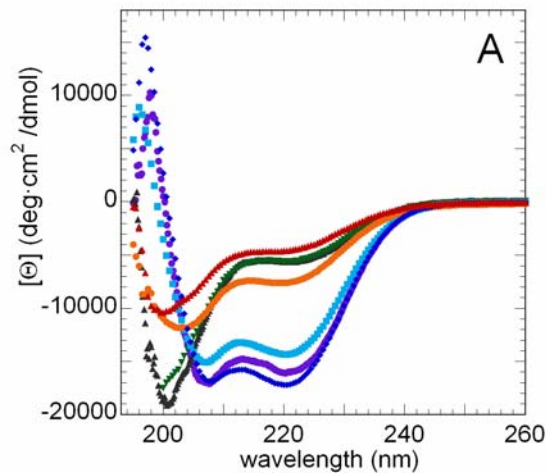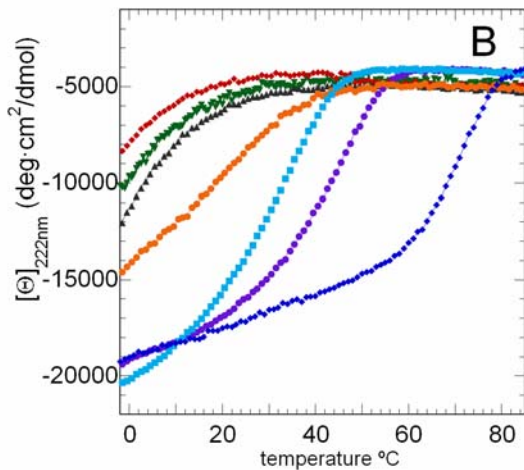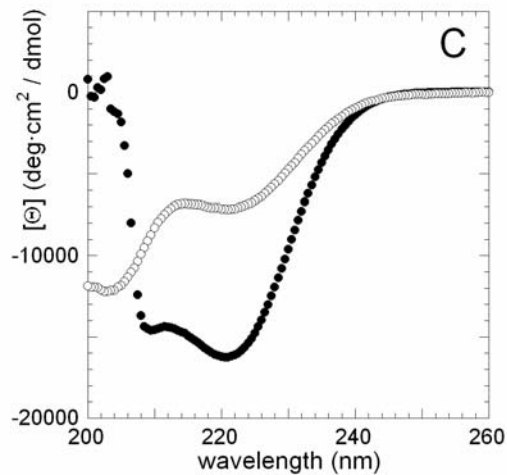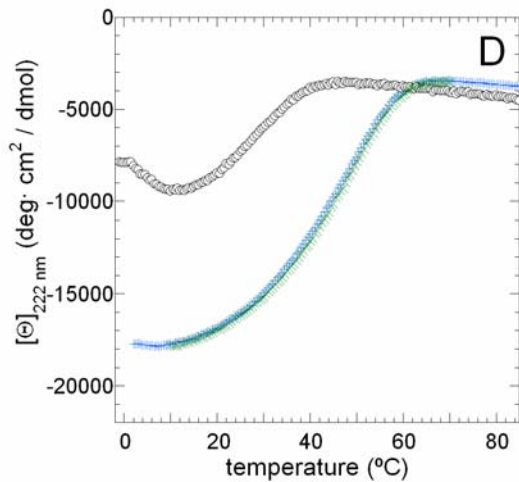

Supplement: pnas_0706876104_1.pdf [file pnas_0706876104_1.pdf]

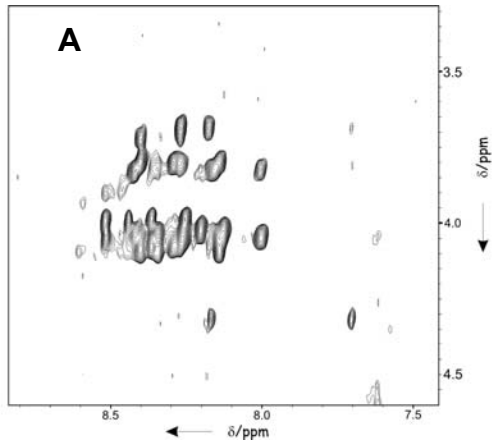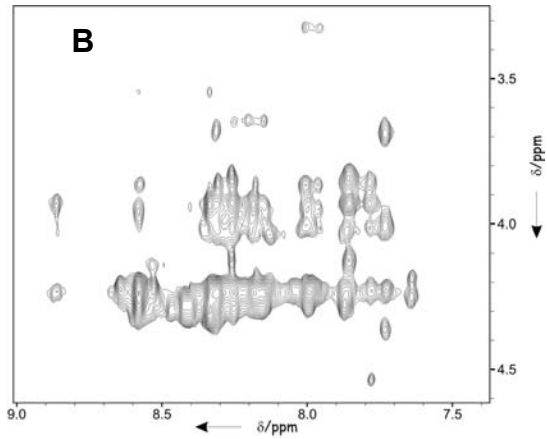

Supplement: pnas_0706876104_3.pdf [file pnas_0706876104_3.pdf]

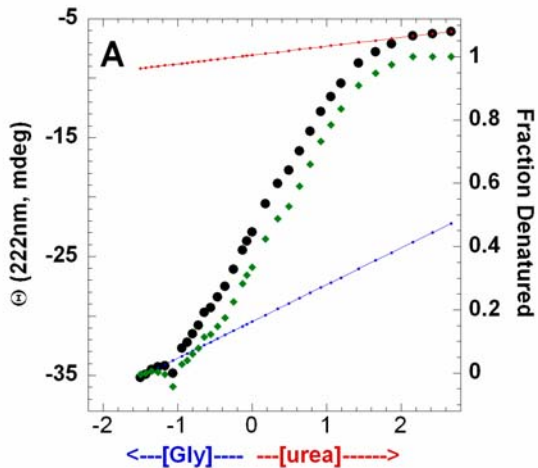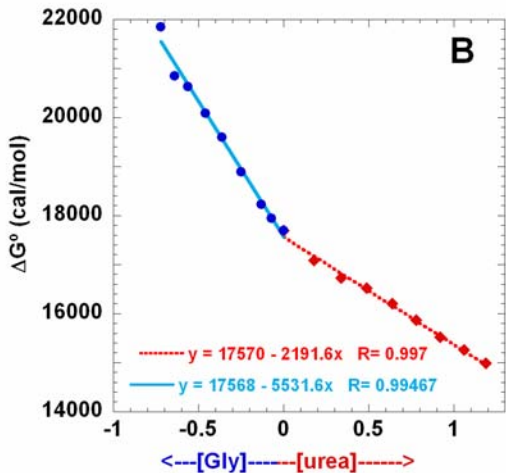

Supplement: pnas_0706876104_5.pdf [file pnas_0706876104_5.pdf]
